# Supplementary material for: Effect of NaCl and EDDS on Heavy Metal Accumulation in Kosteletzkya pentacarpos in Polymetallic Polluted Soil
Source: MDPI journal article supplement (doi:10.3390/plants12081656), 2023-04-14
Supplement: s1 [file s1]

Table S1 Mean values of soil characteristics of upper (0-20 cm) soil in the agricultural plot located in Louvain-la-Neuve (Avenue Baudouin I). Each value is the mean of 3 biological replicates.

| Parameters                                            |                 |
|-------------------------------------------------------|-----------------|
| pH                                                    | $6.86 \pm 0.23$ |
| Soil humidity                                         | $52 \pm 4.8$    |
| Electrical conductivity (mS cm <sup>-1</sup> )        | $0.84 \pm 0.1$  |
| <u>Element concentration (g kg<sup>-1</sup> soil)</u> |                 |
| Ca                                                    | $7.1 \pm 0.5$   |
| Fe                                                    | $19 \pm 0.52$   |
| K                                                     | $18 \pm 0.57$   |
| Mg                                                    | $8.4 \pm 0.27$  |
| Na                                                    | $7.4 \pm 0.16$  |
| S                                                     | $0.37 \pm 0.3$  |
